# Supplementary material for: Genome-Wide Association Study of Milk Composition in Karachai Goats
Source: MDPI journal article supplement (doi:10.3390/ani14020327), 2024-01-21
Supplement: s1 [file s1]

**Table S1.** Description of whole-genome and some suggestive\* SNPs associated with fat content and fatty acids in the milk of Karachai goats

| CHR                                                      | SNP                            | Position    | P        |
|----------------------------------------------------------|--------------------------------|-------------|----------|
| TS                                                       |                                |             |          |
| 2                                                        | snp18646-scaffold1882-539299   | 111 052 769 | 1.41E-06 |
| 3                                                        | snp11864-scaffold144-984620    | 46 725 075  | 9.00E-06 |
| 8                                                        | snp28090-scaffold300-3913146   | 39 751 214  | 9.65E-06 |
| 10                                                       | snp24669-scaffold251-1625913   | 56 089 166  | 6.55E-06 |
| 25                                                       | snp16908-scaffold1766-616140   | 1 861 790   | 7.79E-07 |
| MSNF                                                     |                                |             |          |
| 2                                                        | snp8325-scaffold130-2860751    | 6 443 953   | 1.47E-07 |
| 21                                                       | snp6514-scaffold1230-1489811   | 31 913 916  | 5.18E-06 |
| PT                                                       |                                |             |          |
| 2                                                        | snp8326-scaffold130-2909971    | 6394722     | 2.13E-07 |
| 2                                                        | snp8325-scaffold130-2860751    | 6443953     | 2.88E-06 |
| 8                                                        | snp997-scaffold1026-378556     | 70684382    | 1.34E-06 |
| PC                                                       |                                |             |          |
| 1                                                        | snp19495-scaffold197-240248    | 15 704 998  | 1.51E-06 |
| 2                                                        | snp8325-scaffold130-2860751    | 6 443 953   | 1.47E-07 |
| 8                                                        | snp43684-scaffold585-2375977   | 78 374 813  | 6.26E-06 |
| 8                                                        | snp43681-scaffold585-2255525   | 78 496 104  | 3.69E-07 |
| 8                                                        | snp997-scaffold1026-378556     | 70 684 382  | 9.99E-07 |
| 24                                                       | snp40879-scaffold526-1360443   | 44 527 159  | 7.88E-06 |
| Cas. $\beta$                                             |                                |             |          |
| 2                                                        | snp8326-scaffold130-2909971    | 6 394 722   | 4.54E-08 |
| 2                                                        | snp8325-scaffold130-2860751    | 6 443 953   | 8.00E-07 |
| Fat                                                      |                                |             |          |
| 8                                                        | snp33285-scaffold391-913110    | 6 144 247   | 4.04E-06 |
| 25                                                       | snp16908-scaffold1766-616140   | 1 861 790   | 3.35E-06 |
| Saturated fatty acids (SFA)                              |                                |             |          |
| 2                                                        | snp18646-scaffold1882-539299   | 111 052 769 | 1.41E-06 |
| 3                                                        | snp10469-scaffold1373-2167084  | 52 769 710  | 9.19E-06 |
| 8                                                        | snp33285-scaffold391-913110    | 6 144 247   | 9.68E-06 |
| 13                                                       | snp8522-scaffold1308-1729010*  | 75 367 491  | 2.21E-05 |
| 16                                                       | snp50562-scaffold727-524836*   | 37 286 538  | 1.11E-05 |
| 23                                                       | snp10273-scaffold1368-2701834* | 6 904 785   | 9.35E-05 |
| Monounsaturated fatty acids (MUFA)                       |                                |             |          |
| 1                                                        | snp27412-scaffold292-177570*   | 141 051 692 | 9.19E-05 |
| 13                                                       | snp8522-scaffold1308-1729010*  | 75 367 491  | 2.21E-05 |
| 25                                                       | snp16908-scaffold1766-616140*  | 1 861 790   | 1.23E-05 |
| Polyunsaturated fat (Polyunsaturated fatty acids - PUFA) |                                |             |          |
| 8                                                        | snp47195-scaffold66-1841919*   | 47 780 184  | 2.68E-05 |
| 16                                                       | snp18361-scaffold186-251734*   | 68 374 935  | 7.96E-05 |

|                                |                                |             |          |
|--------------------------------|--------------------------------|-------------|----------|
| 23                             | snp10273-scaffold1368-2701834* | 6 904 785   | 9.35E-05 |
| Long-chain fatty acid (LCFA)   |                                |             |          |
| 4                              | snp1935-scaffold1053-1528396*  | 2 746 300   | 1.96E-05 |
| 8                              | snp33285-scaffold391-913110    | 6 144 247   | 9.68E-06 |
| 10                             | snp1441-scaffold104-780285*    | 25 486 826  | 5.54E-05 |
| 16                             | snp3754-scaffold112-3973504    | 63 371 269  | 5.51E-06 |
| 25                             | snp16908-scaffold1766-616140   | 1 861 790   | 7.79E-07 |
| Medium chain fatty acid (MCFA) |                                |             |          |
| 2                              | snp18646-scaffold1882-539299   | 111 052 769 | 1.41E-06 |
| 3                              | snp10469-scaffold1373-2167084  | 52 769 710  | 9.19E-06 |
| 10                             | snp24669-scaffold251-1625913   | 56 089 166  | 6.55E-06 |
| 16                             | snp50562-scaffold727-524836*   | 37 286 538  | 1.11E-05 |
| 23                             | snp10273-scaffold1368-2701834* | 6 904 785   | 9.35E-05 |
| 25                             | snp16908-scaffold1766-616140   | 1 861 790   | 7.79E-07 |
| Short-chain fatty acid (SCFA)  |                                |             |          |
| 2                              | snp18646-scaffold1882-539299   | 111 052 769 | 1.41E-06 |
| 3                              | snp10469-scaffold1373-2167084  | 52 769 710  | 9.19E-06 |
| 8                              | snp33285-scaffold391-913110    | 6 144 247   | 9.68E-06 |
| 23                             | snp10273-scaffold1368-2701834* | 6 904 785   | 9.35E-05 |
| 25                             | snp16908-scaffold1766-616140   | 1 861 790   | 7.79E-07 |
| Myristic C14:0                 |                                |             |          |
| 2                              | snp18646-scaffold1882-539299   | 111 052 769 | 1.41E-06 |
| 3                              | snp10469-scaffold1373-2167084  | 52 769 710  | 9.19E-06 |
| 8                              | snp28090-scaffold300-3913146   | 39 751 214  | 9.65E-06 |
| 16                             | snp50562-scaffold727-524836*   | 37 286 538  | 1.11E-05 |
| 23                             | snp10273-scaffold1368-2701834* | 6 904 785   | 9.35E-05 |
| Palmitic C16:0                 |                                |             |          |
| 2                              | snp18646-scaffold1882-539299   | 111 052 769 | 1.41E-06 |
| 3                              | snp10469-scaffold1373-2167084  | 52 769 710  | 9.19E-06 |
| 23                             | snp10273-scaffold1368-2701834* | 6 904 785   | 9.35E-05 |
| 25                             | snp16908-scaffold1766-616140   | 1 861 790   | 7.79E-07 |
| Oleic C18:1                    |                                |             |          |
| 4                              | snp1935-scaffold1053-1528396*  | 2 746 300   | 1.96E-05 |
| 8                              | snp33285-scaffold391-913110    | 6 144 247   | 9.68E-06 |
| 10                             | snp1441-scaffold104-780285*    | 25 486 826  | 5.54E-05 |
| 13                             | snp8522-scaffold1308-1729010*  | 75 367 491  | 2.21E-05 |
| 16                             | snp3754-scaffold112-3973504    | 63 371 269  | 5.51E-06 |
| 25                             | snp16908-scaffold1766-616140   | 1 861 790   | 7.79E-07 |
| Trans-isomers fatty acid       |                                |             |          |
| 8                              | snp47195-scaffold66-1841919*   | 47 780 184  | 2.68E-05 |
| 25                             | snp16908-scaffold1766-616140   | 1 861 790   | 7.79E-07 |
| Lactose                        |                                |             |          |
| 1                              | snp19495-scaffold197-240248    | 15 704 998  | 1.51E-06 |
| 1                              | snp23385-scaffold234-683659    | 25 509 749  | 2.58E-06 |

|                                |                              |            |          |
|--------------------------------|------------------------------|------------|----------|
| 6                              | snp30534-scaffold337-667566  | 24 057 337 | 2.49E-06 |
| 8                              | snp997-scaffold1026-378556   | 70 684 382 | 9.99E-07 |
| 8                              | snp43685-scaffold585-2415660 | 78 335 071 | 5.99E-07 |
| 8                              | snp43681-scaffold585-2255525 | 78 496 104 | 3.69E-07 |
| Acetone                        |                              |            |          |
| 3                              | snp22179-scaffold219-771742  | 8 177 011  | 5.47E-06 |
| 7                              | snp21549-scaffold210-2243912 | 3 581 422  | 1.35E-06 |
| 9                              | snp43765-scaffold588-1398750 | 14 534 276 | 4.51E-06 |
| 27                             | snp51892-scaffold762-2837282 | 3 674 006  | 2.12E-06 |
| Beta hydroxybutyrate (BHB)     |                              |            |          |
| 2                              | snp2511-scaffold1071-129957  | 14 902 755 | 9.44E-07 |
| Urea                           |                              |            |          |
| 2                              | snp25937-scaffold2682-105434 | 614 121    | 1.84E-06 |
| 3                              | snp11864-scaffold144-984620  | 46 725 075 | 9.00E-06 |
| Feeding point depression (FPD) |                              |            |          |
| 1                              | snp19495-scaffold197-240248  | 15 704 998 | 1.51E-06 |
| 1                              | snp23385-scaffold234-683659  | 25 509 749 | 2.58E-06 |
| Acidity                        |                              |            |          |
| 1                              | snp19495-scaffold197-240248  | 15 704 998 | 1.51E-06 |
| 1                              | snp23385-scaffold234-683659  | 25 509 749 | 2.58E-06 |
| 8                              | snp43684-scaffold585-2375977 | 78 374 813 | 6.26E-06 |
| 8                              | snp43681-scaffold585-2255525 | 78 496 104 | 3.69E-07 |

**Table S2.** Annotation of the identified candidate genes for the component composition of milk of Karachai goats

| CHR | SNP±200 kb                                           | No SNP – serial number of SNP in Figure 1 | Trait                        | Gene                                          | Biological function                                                 |
|-----|------------------------------------------------------|-------------------------------------------|------------------------------|-----------------------------------------------|---------------------------------------------------------------------|
| 1   | snp27412-scaffold292-177570<br>141251692...140851692 | 1                                         | MUFA                         | <i>MX2</i> <sup>141193475..141232778</sup>    | protective response to the virus                                    |
| 2   | snp18646-scaffold1882-539299111252769...110852769    | 3                                         | TS, MCFA, SFA C14, C16, SCFA | <i>METTL8</i> <sup>111185392..111270066</sup> | development of skeletal muscle tissue, differentiation of fat cells |
| 2   | snp9402-scaffold1341-2132092114722555...114322555    | 4                                         | BHB, Acetone                 | <i>ATF2</i> <sup>114518050..114597771</sup>   | development of skeletal muscle tissue, differentiation of fat cells |
| 2   | snp8314-scaffold130-                                 | 5                                         | TS                           | <i>LUZP1</i> <sup>6185376..6286457</sup>      | development of the interventricular septum, bending                 |

|   |                                                                |    |          |                                                |                                                                                                                                                                                                                     |
|---|----------------------------------------------------------------|----|----------|------------------------------------------------|---------------------------------------------------------------------------------------------------------------------------------------------------------------------------------------------------------------------|
|   | 2382340 <sup>7122494...67</sup><br>22494                       |    |          |                                                | of neural folds, development of arteries                                                                                                                                                                            |
| 2 | snp8322-scaffold130-2738985 <sup>6766020...</sup><br>6566020   | 6  | TFA      | <i>HTR1D</i> <sup>6305115..6</sup><br>307862   | smooth muscle contraction, chemical synaptic transmission, regulation of locomotion, vasoconstriction, regulation of behavior                                                                                       |
| 2 | snp25937-scaffold2682-105434 <sup>814121...41412</sup><br>1    | 7  | Urea, TS | <i>NECAP2</i> <sup>486514..</sup><br>500217    | endocytosis                                                                                                                                                                                                         |
| 2 | snp8314-scaffold130-2382340 <sup>7122494...67</sup><br>22494   | 8  | TS       | <i>ID3</i> <sup>6650387..6652141</sup>         | development of the central nervous system, development of the heart                                                                                                                                                 |
|   |                                                                |    |          | <i>HMGCL</i> <sup>6836125..</sup><br>6855444   | lipid metabolism, mitochondrial organization, process of biosynthesis of ketone bodies                                                                                                                              |
| 2 | snp2511-scaffold1071-129957 <sup>15102755...147</sup><br>02755 | 9  | BHB      | <i>HPCA</i> <sup>14931533..14</sup><br>940116  | development of the inner ear, cellular response to calcium ions, regulation of the activity of voltage-gated calcium channels                                                                                       |
|   |                                                                |    |          | <i>FNDC5</i> <sup>14907902..</sup><br>14915966 | response to muscle activity, positive regulation of brown fat cell differentiation                                                                                                                                  |
| 2 | snp47697-scaffold670-1960487 <sup>9886517...</sup><br>9486517  | 10 | MSNF     | <i>SLC9A</i><br>9830831..9883473               | cellular sodium ion homeostasis, pH regulation, response to muscle distribution, cellular response to acidic pH, cellular response to adrenaline stimulus, regulation of heart rate strength via cardiac conduction |
| 3 | snp22179-scaffold219-771742 <sup>8377011...7977</sup><br>011   | 11 | Acetone  | <i>NEU2</i> <sup>8043799..8057</sup><br>992    | catabolic process of glycoproteins, catabolic process of gangliosides, catabolic process of cellular oligosaccharides                                                                                               |
|   |                                                                |    |          | <i>GIGYF2</i> <sup>8226338..8</sup><br>358229  | feeding behavior, locomotor behavior of adults, postembryonic development, growth of a multicellular organism, metabolic process of cellular protein, balance of neuromuscular processes                            |
|   |                                                                |    |          | <i>INPP5D</i> <sup>7877943..</sup><br>8015888  | immune system process, longevity                                                                                                                                                                                    |
| 3 | snp48374-scaffold687-                                          | 12 | TS       | <i>PGM1</i> <sup>38942586..39</sup><br>008777  | glucose metabolic process                                                                                                                                                                                           |

|   |                                                                           |    |                         |                                                    |                                                                                                                                                                                                                                                                                      |
|---|---------------------------------------------------------------------------|----|-------------------------|----------------------------------------------------|--------------------------------------------------------------------------------------------------------------------------------------------------------------------------------------------------------------------------------------------------------------------------------------|
|   | 1302080 <sup>38979227...3</sup><br>8579227                                |    |                         |                                                    |                                                                                                                                                                                                                                                                                      |
| 3 | snp55013-<br>scaffold841-<br>1661526 <sup>105681913...</sup><br>105281913 | 13 | pH                      | <i>ARHGEF2</i> <sup>10530</sup><br>3668..105353888 | cell morphogenesis, nervous system development, innate immune response                                                                                                                                                                                                               |
|   |                                                                           |    |                         | <i>LMNA</i> <sup>105450088..</sup><br>105478581    | development of ventricular cardiac muscle cells                                                                                                                                                                                                                                      |
| 4 | snp1935-<br>scaffold1053-<br>1528396 <sup>2946300...</sup><br>2546300     | 14 | PUFA,<br>LCFA,<br>C18:1 | <i>INSIG1</i> <sup>12747017..27</sup><br>57803     | triglyceride metabolic process, cholesterol biosynthesis process, cholesterol metabolism process, cholesterol homeostasis, negative regulation of fat cell differentiation, negative regulation of fatty acid biosynthesis process, palate development, cranial suture morphogenesis |
|   |                                                                           |    |                         | <i>EN2</i><br>2659430..2666542                     | midbrain development, hindbrain development, neuronal development, embryonic brain development                                                                                                                                                                                       |
|   |                                                                           |    |                         | <i>PAXIP1</i> <sup>2922811..2</sup><br>963751      | development of adipose tissue, chorion development                                                                                                                                                                                                                                   |
| 4 | snp38614-<br>scaffold49-<br>1209913 <sup>110877395...</sup><br>110477395  | 15 | Acetone                 | <i>CDK6</i> <sup>110413189..11</sup><br>0678573    | response to the virus                                                                                                                                                                                                                                                                |
| 5 | snp47348-<br>scaffold666-<br>528999 <sup>97220952...</sup><br>96820952    | 16 | Acetone                 | <i>ETV6</i> <sup>96570433..9685</sup><br>7059      | vitellogenesis, neurogenesis                                                                                                                                                                                                                                                         |
| 5 | snp12158-<br>scaffold1450-<br>249468 <sup>107408739...</sup><br>107008739 | 17 | Acetone                 | <i>CACNA1C</i> <sup>10732</sup><br>8368..107719644 | immune system development, heart development                                                                                                                                                                                                                                         |
| 8 | snp10589-<br>scaffold1376-<br>2594525 <sup>73806016...</sup><br>3406016   | 18 | PC                      | <i>DPYSL2</i> <sup>73547764.</sup><br>.73663711    | brain development                                                                                                                                                                                                                                                                    |
|   |                                                                           |    |                         | <i>ADRA1A</i> <sup>7374739</sup><br>7..73862840    | negative regulation of heart rate involved in baroreceptor response to increased systemic blood pressure, adult cardiac development, multicellular aging, regulation of cardiac muscle, fractional cells, cell growth in cardiac muscle cell development                             |

|    |                                                             |    |                         |                                              |                                                                                                                                                                                                                                                                                              |
|----|-------------------------------------------------------------|----|-------------------------|----------------------------------------------|----------------------------------------------------------------------------------------------------------------------------------------------------------------------------------------------------------------------------------------------------------------------------------------------|
| 8  | snp43637-scaffold585-317127 <sup>80644212...80244212</sup>  | 19 | pH                      | <i>DAPK1</i> <sup>80466314..80672849</sup>   | protective response to tumor cells, innate immune response, cellular response to organic matter                                                                                                                                                                                              |
| 8  | snp43681-scaffold585-2255525 <sup>78696104...78296104</sup> | 20 | pH, Lactose, PC, β-κз   | <i>AGTPBP1</i> <sup>78600749..78791306</sup> | neuromuscular process                                                                                                                                                                                                                                                                        |
| 8  | snp47195-scaffold66-1841919 <sup>47980184...47580184</sup>  | 21 | TFA, PUFA               | <i>CEMIP2</i> <sup>47675207..47756816</sup>  | metabolic process                                                                                                                                                                                                                                                                            |
| 8  | snp997-scaffold1026-378556 <sup>70884382...70484382</sup>   | 22 | PC, Lactose, Cas. β, pH | <i>NKX3-1</i> <sup>70600953..70606837</sup>  | development of the heart, development of the dorsal aorta, development of the pharyngeal system                                                                                                                                                                                              |
|    |                                                             |    |                         | <i>NKX2-6</i> <sup>70639383..70643794</sup>  | development of the hypothalamus, development of the embryonic heart tube, development of the tongue, development of the guiding tract, development of the cardiac muscle cells of the atria, development of the cardiac muscle cells of the ventricles, development of the pharyngeal system |
|    |                                                             |    |                         | <i>STC1</i> <sup>70791218..70806076</sup>    | regulation of cardiac muscle, positive regulation of import and sources, negative regulation of renal phosphate excretion                                                                                                                                                                    |
| 8  | snp34748-scaffold412-871719 <sup>91227795...90827795</sup>  | 23 | FAT                     | <i>BAAT</i> <sup>90845022..90861305</sup>    | bile acid conjugation, glycine metabolic process, fatty acid metabolic process, bile acid biosynthesis process                                                                                                                                                                               |
|    |                                                             |    |                         | <i>PLPPR1</i> <sup>90695441..90835782</sup>  | process of phospholipid metabolism, development of the nervous system                                                                                                                                                                                                                        |
| 8  | snp28090-scaffold300-3913146 <sup>39951214...39551214</sup> | 24 | TS, PUFA, C14           | <i>SLC1A</i> <sup>39770036..39845247</sup>   | behavioral response insurance, brain development, memory, sexual behavior, neurogenesis, adult behavior, morphogenesis of blood vessels                                                                                                                                                      |
| 10 | snp1441-scaffold104-                                        | 25 | LCFA, C18               | <i>FUT8</i> <sup>25310706..25629694</sup>    | left gas exchange                                                                                                                                                                                                                                                                            |

|    |                                                                         |    |                       |                                           |                                                                                                                         |
|----|-------------------------------------------------------------------------|----|-----------------------|-------------------------------------------|-------------------------------------------------------------------------------------------------------------------------|
|    | 780285 <sup>25686826...252</sup><br>86826                               |    |                       |                                           |                                                                                                                         |
| 10 | snp24669-<br>scaffold251-<br>1625913 <sup>56289166...5</sup><br>5889166 | 26 | TS, PUFA,<br>MCFA     | TPM1                                      | morphogenesis of cardiac muscle<br>tissue of the ventricles,<br>contraction of cardiac muscle                           |
|    |                                                                         |    |                       | LACTB                                     | regulation of lipid metabolism                                                                                          |
| 13 | snp5221-<br>scaffold1180-<br>236240 <sup>36057527...356</sup><br>57527  | 27 | PC, $\beta$ -ka3      | ODAD2 <sup>35971967..</sup><br>36143096   | heart development, development<br>of the ventricular system                                                             |
| 13 | snp8522-<br>scaffold1308-<br>1729010 <sup>75567491...7</sup><br>5167491 | 28 | MUFA, C18,<br>SFA     | EYA2 <sup>75025156..752</sup><br>83017    | development of striated muscle<br>tissue                                                                                |
| 16 | snp18361-<br>scaffold186-<br>251734 <sup>68574935...681</sup><br>74935  | 29 | PUFA                  | PROX1 <sup>68179003..</sup><br>68234777   | determination of cell<br>development/death, kidney<br>development                                                       |
| 16 | snp50562-<br>scaffold727-<br>524836 <sup>37486538...</sup><br>37086538  | 30 | TS, SFA,<br>MCFA, C14 | FMO2 <sup>37286455..37</sup><br>330116    | acid determination metabolic<br>process, toxin metabolic process,<br>oxygen metabolic process                           |
|    |                                                                         |    |                       | FMO1 <sup>37336303..37</sup><br>376884    | metabolic process of acid<br>determination, metabolic process<br>of xenobiotics, metabolic process<br>of toxins         |
| 16 | snp3754-<br>scaffold112-<br>3973504 <sup>63571269...6</sup><br>3171269  | 31 | LCFA, C18,<br>MUFA    | NCF2 <sup>63224955..632</sup><br>63716    | phagocytosis, “oxygen<br>explosion”, trophy of neutral<br>leukocytes in the pathogenesis of<br>the inflammatory process |
| 16 | snp8683-<br>scaffold131-<br>4589642 <sup>54997494...5</sup><br>4597494  | 32 | FAT, PT               | TNN <sup>54831011..5490</sup><br>3426     | regulation of bone development                                                                                          |
| 18 | snp18289-<br>scaffold1857-<br>308667 <sup>56470790...560</sup><br>70790 | 33 | Urea                  | SULT2B1 <sup>5623954</sup><br>7..56275810 | cholesterol metabolic process                                                                                           |
|    |                                                                         |    |                       | GRIN2D <sup>56117047</sup><br>..56151568  | reaction to fear, motor behavior<br>of adults, regulation of sensory<br>perception of pain                              |
|    |                                                                         |    |                       | SPHK2 <sup>56292056..5</sup><br>6299987   | blood vessel development, brain<br>development                                                                          |
|    |                                                                         |    |                       | NTN5 <sup>56321271..563</sup><br>26460    | neurogenesis                                                                                                            |
|    |                                                                         |    |                       | IZUMO1 <sup>5639389</sup><br>9..56396881  | fusion of sperm with the plasma<br>membrane of the egg, sperm-egg<br>recognition                                        |

|    |                                                                                                                            |    |                                                             |                                              |                                                                                                                                                                                                             |
|----|----------------------------------------------------------------------------------------------------------------------------|----|-------------------------------------------------------------|----------------------------------------------|-------------------------------------------------------------------------------------------------------------------------------------------------------------------------------------------------------------|
|    |                                                                                                                            |    |                                                             | <i>FUT1</i> <sup>56399123...56402123</sup>   | metabolic process, protein glycosylation                                                                                                                                                                    |
| 21 | snp6484-scaffold1230-240156 <sup>33359659...32959659</sup>                                                                 | 34 | MSNF                                                        | <i>MPI</i> <sup>33246409...33253730</sup>    | metabolic process of carbohydrates                                                                                                                                                                          |
| 23 | snp10273-scaffold1368-2701834 <sup>7104785...6704785</sup>                                                                 | 35 | TS, C14, C16, MCFA, PUFA, SFA, SCFA                         | <i>PHACTR1</i> <sup>6556030...7073500</sup>  | development of the cerebral cortex                                                                                                                                                                          |
| 23 | snp48737-scaffold692-158314 <sup>45730320...45330320</sup>                                                                 | 36 | PC                                                          | <i>BAG2</i> <sup>45658115...45668381</sup>   | chemical protein process                                                                                                                                                                                    |
| 25 | snp16907-scaffold1766-582489 <sup>2027754...1627754</sup><br><br>snp16908-scaffold1766-616140 <sup>2061790...1661790</sup> | 37 | TS, SFA, PUFA, MUFA, MCFA, C16, C18:1, LCFA, C14, SCFA, TFA | <i>ECI1</i> <sup>1672290...1685556</sup>     | beta-oxidation of fatty acids                                                                                                                                                                               |
|    |                                                                                                                            |    |                                                             | <i>PGP</i> <sup>1649864...1652731</sup>      | glycerol biosynthesis process                                                                                                                                                                               |
|    |                                                                                                                            | 38 |                                                             | <i>ABCA3</i> <sup>1701870...1743075</sup>    | positive regulation of cholesterol efflux, lung development, phosphatidylcholine metabolic process, phosphatidylglycerol metabolic process, lipid biosynthesis regulation process, phospholipid homeostasis |
|    |                                                                                                                            |    |                                                             | <i>AMDHD2</i> <sup>1915270...1921956</sup>   | metabolic process of carbohydrates                                                                                                                                                                          |
|    |                                                                                                                            |    |                                                             | <i>PDPK1</i> <sup>1932902...1996678</sup>    | pancreatic type B cell development, cellular response to epidermal growth factor stimulus                                                                                                                   |
|    |                                                                                                                            |    |                                                             |                                              |                                                                                                                                                                                                             |
| 26 | snp18573-scaffold1878-337881 <sup>14293322...13893322</sup>                                                                | 39 | Cas. $\beta$                                                | <i>PDZD8</i> <sup>14290884...14368219</sup>  | pancreatic type B cell development, cellular response to epidermal growth factor stimulus                                                                                                                   |
| 26 | snp41130-scaffold532-1727870 <sup>30209081...29809081</sup>                                                                | 40 | SCFA                                                        | <i>SEMA4G</i> <sup>29853719...29867663</sup> | maintenance of the nervous system, cell differentiation                                                                                                                                                     |
| 26 | snp47577-scaffold67-3351554 <sup>17989628...17589628</sup>                                                                 | 41 | Cas. $\beta$ , PC                                           | <i>CASP7</i> <sup>17808414...17850585</sup>  | heart development                                                                                                                                                                                           |
|    |                                                                                                                            |    |                                                             | <i>NRAP</i> <sup>32471325...32547298</sup>   | tendon joint of the thigh                                                                                                                                                                                   |
|    |                                                                                                                            |    |                                                             | <i>HABP2</i> <sup>17935249...17970574</sup>  | blood clotting                                                                                                                                                                                              |



|    |                                                             |    |                    |                                             |                                                                                                                                        |
|----|-------------------------------------------------------------|----|--------------------|---------------------------------------------|----------------------------------------------------------------------------------------------------------------------------------------|
| 27 | snp51881-scaffold762-2349319 <sup>4343759...3943759</sup>   | 42 | Acetone            | <i>THRB</i> <sup>3763978..4201001</sup>     | positive regulation of thyroid hormone-mediated signaling pathway, sensory sound perception, negative regulation of female receptivity |
| 27 | snp55772-scaffold864-4012988 <sup>20994598...20594598</sup> | 43 | MSNF, Cas. $\beta$ | <i>MFHAS1</i> <sup>20648690..20757838</sup> | reaction to an inflammatory process in the body                                                                                        |

Note\*: CHR – chromosome, SNP – single nucleotide polymorphism; genes located within SNPs are highlighted in bold.

Fat – fat content; PT – true protein content; PC – crude protein content; Lactose – lactose; MSNF – milk solids not fat ; TS – total solids; Cas.  $\beta$  – casein; BHB - hydroxy-butyrate; C14:0 – myristic FA; C16:0 – palmitic FA; C18:1 – oleic FA; LCFA – long chain fatty acids; MCFA – medium chain fatty acids; MCFA – monounsaturated fatty acids; PUFA – polyunsaturated fatty acids; SFA – saturated fatty acids; SCFA – short chain fatty acids; TFA – trans-isomers of fatty acids.
